# Supplementary material for: Deep Learning Algorithm for Predicting Rapid Progression of Abdominal Aortic Aneurysm by Integrating CT Images and Clinical Features
Source: Research Square preprint supplement (doi:10.21203/rs.3.rs-6385904/v1), 2025-05-07
Supplement: Supplementary file 1 [file 4b1c5e2bf56a3b3d44d47f7f.pdf]

1 **Table S1.** Definition of geometric features from CT annotations.

| Name                                | Definition                                                                                                                                                                                                                                                                                                    |
|-------------------------------------|---------------------------------------------------------------------------------------------------------------------------------------------------------------------------------------------------------------------------------------------------------------------------------------------------------------|
| <b>Mesh Volume</b>                  | A 3D structure of aorta was generated from annotation on CT images. The structure was consisted of triangle meshes generated by a algorithm of PyRadiomics. The detail of algorithm is referred to PyRadiomics official documents.*<br>The mesh volume is calculated from the triangle mesh of the structure. |
| <b>Voxel Volume</b>                 | The voxel volume of the structure is approximated by mulplying the number of voxels in the structure by the volume of a single voxel.                                                                                                                                                                         |
| <b>Surface Area</b>                 | The surface area of each triangle in the mesh is calculated. And the total surface area of the structure. is then obtained by taking the sum of all calculated areas.                                                                                                                                         |
| <b>Surface Volume Ratio</b>         | A lower value of the surface area to mesh volume ratio indicates a more compact (sphere-like) shape.                                                                                                                                                                                                          |
| <b>Sphericity</b>                   | Ity is a measure of the roundness of the shape of the structure relative to a sphere. If a value of the sphericity is 1, it indicates a perfect sphere.                                                                                                                                                       |
| <b>Maximum 2D Diameter (Column)</b> | It is defined as the largest pairwise Euclidean distance between surface mesh vertices of the structure in the row-slice (usually the coronal plane).                                                                                                                                                         |
| <b>Maximum 2D Diameter (Row)</b>    | It is defined as the largest pairwise Euclidean distance between surface mesh vertices of the structure in the column-slice (usually the sagittal) plane.                                                                                                                                                     |
| <b>Maximum 2D Diameter (Slice)</b>  | It is defined as the largest pairwise Euclidean distance between surface mesh vertices of the structure in the row-column (generally the axial) plane.                                                                                                                                                        |
| <b>Maximum 3D Diameter</b>          | It is defined as the largest pairwise Euclidean distance between surface mesh vertices of the structure.                                                                                                                                                                                                      |
| <b>Major Axis Length</b>            | It is defined as the largest axis length of the structure-enclosing ellipsoid and is calculated using the largest principal component $\lambda_{major}$ .                                                                                                                                                     |
| <b>Minor Axis Length</b>            | It is defined as the second-largest axis length of the structure - enclosing ellipsoid and is calculated using the largest principal component $\lambda_{minor}$ .                                                                                                                                            |
| <b>Least Axis Length</b>            | It is defined as the smallest axis length of the structure -enclosing ellipsoid and is calculated using the largest principal component $\lambda_{least}$ .                                                                                                                                                   |
| <b>Elongation</b>                   | It is defined as the relationship between the two largest principal components in the structure shape.<br>If a value of the elongation is 1, the cross section through the first and second largest principal components is circle-like (non-elongated).                                                      |
| <b>Flatness</b>                     | It is defined as the relationship between the largest and smallest principal components in the structure shape.<br>If a value of the flatness 1, the cross section through the largest and smallest principal components is sphere-like.                                                                      |

2 \* The contents of this table was a summary PyRadiomics official document

3 For more detail, please refer to PyRadiomics official documentation:

4 <https://pyradiomics.readthedocs.io/en/latest/features.html#module-radiomics.shape>

**Table S2.** Comparison of demographic and clinical features between groups in the dataset.

| <b>Rapid: Growth rate<br/>&gt; 2.5mm/year</b>                 | <b>BMC, n (%)<br/>(n = 236)</b> |                           |                | <b>SNUH, n (%)<br/>(n = 325)</b> |                           |                |
|---------------------------------------------------------------|---------------------------------|---------------------------|----------------|----------------------------------|---------------------------|----------------|
|                                                               | <b>Rapid<br/>(n = 81)</b>       | <b>Slow<br/>(n = 155)</b> | <b>P value</b> | <b>Rapid<br/>(n = 114)</b>       | <b>Slow<br/>(n = 211)</b> | <b>P value</b> |
| <b>Sex, male</b>                                              | 59 (72.8)                       | 117 (75.5)                | 0.775*         | 98 (86)                          | 183 (86.7)                | 0.982*         |
| <b>Age, years (mean <math>\pm</math> SD)</b>                  | 74.5 $\pm$ 8.62                 | 72.3 $\pm$ 8.90           | 0.146**        | 69.4 $\pm$ 7.80                  | 67.5 $\pm$ 8.14           | 0.079**        |
| <b>COPD</b>                                                   | 17 (21)                         | 25 (16.1)                 | 0.455*         | 31 (27.2)                        | 50 (23.7)                 | 0.575*         |
| <b>DM</b>                                                     | 13 (16)                         | 38 (24.5)                 | 0.182*         | 21 (18.4)                        | 68 (32.2)                 | 0.011*         |
| <b>Smoking status</b>                                         |                                 |                           | 0.830*         |                                  |                           | 0.540*         |
| Never                                                         | 38 (46.9)                       | 69 (44.5)                 |                | 51 (44.7)                        | 108 (51.2)                |                |
| Current                                                       | 20 (24.7)                       | 36 (23.2)                 |                | 22 (19.3)                        | 36 (17.1)                 |                |
| Past                                                          | 23 (28.4)                       | 50 (32.3)                 |                | 41 (36)                          | 67 (31.8)                 |                |
| <b>Initial size of AAA, mm<br/>(mean <math>\pm</math> SD)</b> | 38.4 $\pm$ 5.23                 | 32.3 $\pm$ 4.98           | < 0.001**      | 38.5 $\pm$ 5.47                  | 33.7 $\pm$ 5.15           | < 0.001**      |
| <b>Number of images</b>                                       | 1732                            | 3443                      |                | 3306                             | 5771                      |                |

Abbreviations: AAA: Abdominal aortic aneurysm; BMC: Boramae medical center; COPD: chronic obstructive pulmonary disease; DM: diabetes mellitus; SD: standard deviation; SNUH: Seoul national university hospital.

Notes:

\* Pearson's chi-squared test between BMC and SNUH dataset.

\*\* Wilcoxon rank-sum test between BMC and SNUH dataset.
